# Supplementary material for: Fabrication of core–shell Prussian blue analogue@ZnIn2S4 nanocubes for efficient photocatalytic hydrogen evolution coupled with biomass furfuryl alcohol oxidation
Source: Royal Society of Chemistry journal article supplement (doi:10.1039/d4dt02752c), 2024-11-27
Supplement: d4dt02752c1.pdf [file d4dt02752c1.pdf]

## Electronic Supplementary Information

### **Fabrication of core-shell Prussian blue analogues@ZnIn<sub>2</sub>S<sub>4</sub> nanocubes for efficient photocatalytic hydrogen evolution coupling with biomass furfuryl alcohol oxidation**

Yi-Fei Huang<sup>a</sup>, Jia-Jia Zhang <sup>a</sup>, Ye-Jun Wang <sup>a</sup>, Yuan-Sheng Cheng <sup>b</sup>, Min Ling <sup>c</sup>, Pan Pan <sup>c</sup>, Dongdong Liu <sup>a,c</sup>, Fang-Hui Wu <sup>a</sup> and Xian-Wen Wei <sup>a,\*</sup>

<sup>a</sup> School of Chemistry and Chemical Engineering, Institute of Materials Sciences and Engineering, Institute of Clean Energy and Advanced Nanocatalysis (iClean), Anhui Province Key Laboratory of Coal Clean Conversion and High Valued Utilization, Anhui University of Technology, Maanshan 243002, China

<sup>b</sup> School of Metallurgical Engineering, Anhui University of Technology, Maanshan 243002, China

<sup>c</sup> Anhui Province Key Laboratory of Conservation and Utilization for Dabie Mountain Special Bio-Resources, West Anhui University, Lu'an, 237012, China

## **1. Experimental**

### **1.1 Materials**

$M^{II}(CH_3COO)_2 \cdot nH_2O$  and trisodium citrate were purchased from Adamas. Potassium hexacyanocobaltate and potassium ferricyanide were obtained from Sigma-Aldrich. Other chemicals were of analytical grade and were used without additional purification. Ultrapure water (18.2 M $\Omega$  cm) supplied by a Milli-Q system was used throughout the study.

### **1.2 Photocatalytic performance testing**

The photocatalyst performance evaluation was conducted using a multi-channel photochemical reaction system (PCX-50C, Beijing Perfectlight) with a white LED as the light source. The output power of the light source was precisely controlled using an irradiance meter (FZ-A) to maintain a constant irradiance intensity of 100 mW/cm<sup>2</sup>. Typically, 12 mL of suspension containing 10 mM furfuryl alcohol and 6 mg of photocatalyst was added to a sealed quartz vessel equipped with a rubber plug and magnetic stirring. The entire system was purged with Ar gas and maintained at 25 °C by a continuous flow of cooling water during the illumination. The gas products were detected using gas chromatography (GC, Agilent 7820A).

### **1.3 Liquid products analysis**

The products for photo-hydrogenation of furfural alcohols (FOL) were analyzed by high-performance liquid chromatography (HPLC, Shimadzu LC-20A). 1 mL of the reaction mixture was filtered by a 0.22  $\mu$ m filter membrane to remove solid catalyst. HPLC was carried out on a Shimadzu C18 column (150 $\times$ 4.6 mm) with CH<sub>3</sub>CN: H<sub>2</sub>O

aqueous solution (40:60) as the mobile phase. The flow rate was 0.5 mL/min and the detection wavelength of ultraviolet-visible detector was 230 nm, respectively.

The conversion of FOL and the selectivity of furfural (FAL) were defined as follows:

$$\text{Conversion (\%)} = [(C_0 - C_{\text{FOL}})/C_0] \times 100\%,$$

$$\text{Selectivity (\%)} = [C_{\text{FAL}}/(C_0 - C_{\text{FOL}})] \times 100\%,$$

where  $C_0$  is the initial concentration of FOL,  $C_{\text{FOL}}$  and  $C_{\text{FAL}}$  are the concentrations of the substrate FOL and FAL.

#### 1.4 Electrochemical measurements

All the electrochemical measurements were conducted on a three electrode system at an electrochemical station (CHI 660E). The catalyst coated glass carbon electrode or FTO glass were used as the working electrode, Pt as the counter-electrode, and Ag/AgCl or saturated calomel electrode (SCE) as the reference electrode. Linear sweep voltammetry (LSV) was measured at a scan rate of 5 mV s<sup>-1</sup> to obtain the polarization curves with 0.5 M K<sub>2</sub>SO<sub>4</sub> using as electrolyte. Electrochemical impedance spectra (EIS) was recorded at an open circuit voltage in 5 mM K<sub>3</sub>[Fe(CN)<sub>6</sub>] and K<sub>4</sub>[Fe(CN)<sub>6</sub>] aqueous solution with 0.1 M KCl. Photocurrent response and Mott-Schottky plots (taken at 1 kHz) were tested at 0.5 M Na<sub>2</sub>SO<sub>4</sub>, and using sample coated FTO glass as working electrode. All the potentials were displayed versus the reversible hydrogen electrode (RHE) by

$$E_{(\text{RHE})} = E_{(\text{Ag}/\text{AgCl})} + 0.197 + 0.059 \times \text{pH}$$

#### 1.5 Theoretical calculations

The VASP software<sup>[S1,S2]</sup> was employed to perform all the spin-polarized density

functional theory (DFT) calculations within the generalized gradient approximation (GGA) using the Perdew-Burke-Ernzerhof (PBE)<sup>[S3]</sup> formulation. The projected augmented wave (PAW) potentials<sup>[S4,S5]</sup> were chosen to describe the ionic cores and take valence electrons into account using a plane wave basis set with a kinetic energy cutoff of 400 eV. The Gaussian smearing method and a width of 0.05 eV were utilized to allow partial occupancies of the Kohn–Sham orbitals. The electronic energy was considered self-consistent when the energy change was smaller than 10<sup>−6</sup> eV. Convergence of the geometry optimization was determined when the force change was smaller than  $-0.05$  eV/Å<sup>2</sup>. Grimme’s DFT-D3 methodology<sup>[S6]</sup> was employed to describe the dispersion interactions among all the atoms. A 15 Å vacuum layer in the z direction separated the slab from its periodic images. During structural optimizations of the surface models, a 2×2×1 gamma-point centered k-point grid for the Brillouin zone was used.

## 2. Supplementary Results

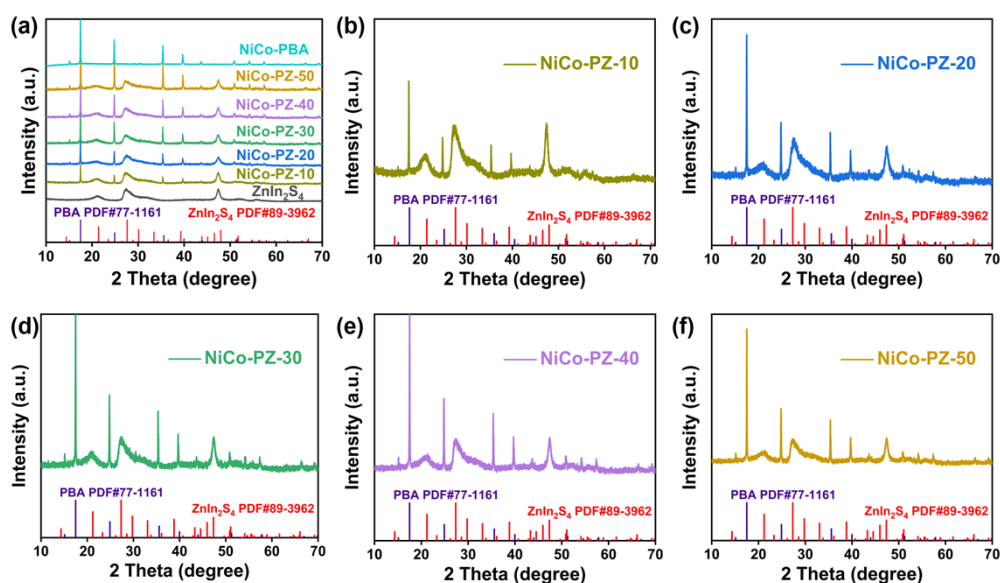

**Fig. S1** the XRD patterns of as-prepared samples.

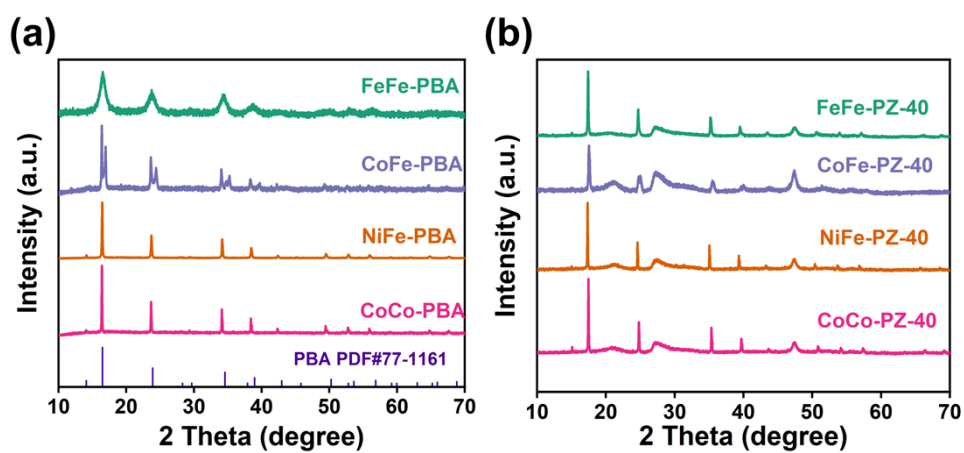

**Fig. S2** the XRD patterns of (a) PBA with different metal centers and (b) M<sup>II</sup>-M<sup>III</sup> PBA@ZIS with different metal centers.

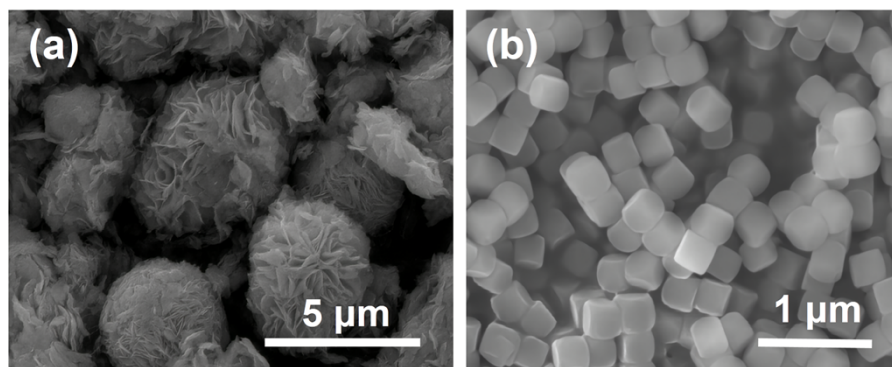

**Fig. S3** SEM images of (a) bare ZnIn<sub>2</sub>S<sub>4</sub> and (b) NiCo-PBA.

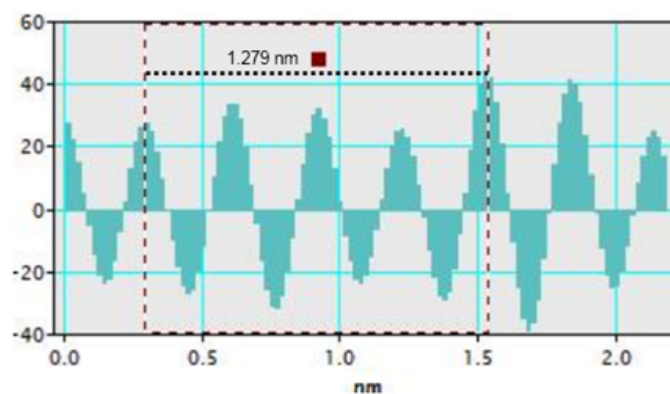

**Fig. S4** The result of FFT measurement.

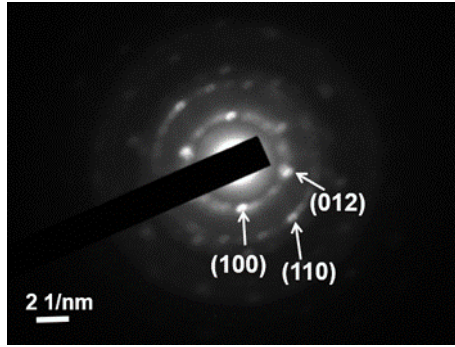

**Fig. S5** The selected area electron diffraction (SAED) pattern of NiCo-PZ-40.

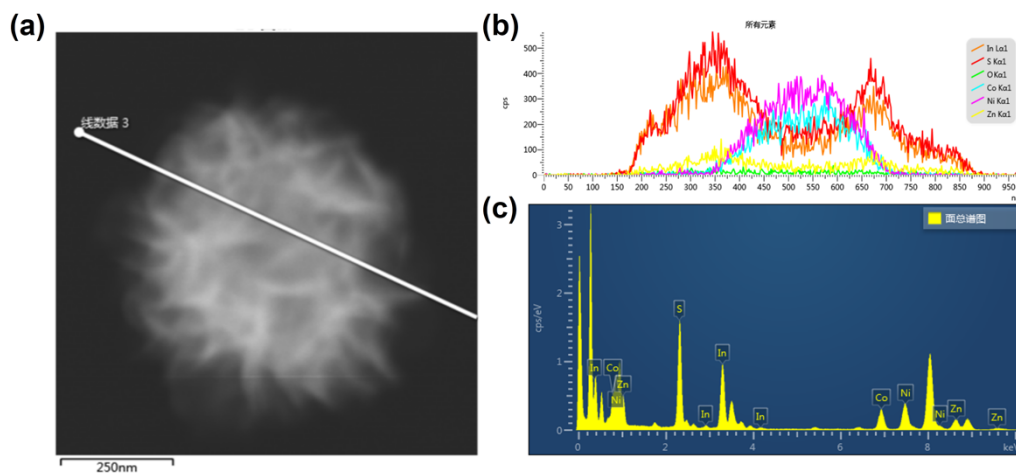

**Fig. S6** (a) STEM image, (b) EDX line scanning spectra and (c) raw spectrum of NiCo-PZ-40.

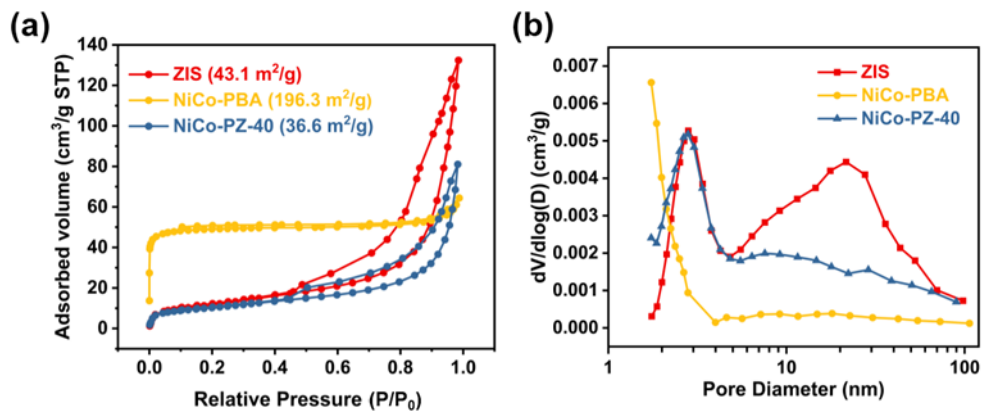

**Fig. S7**  $N_2$  adsorption–desorption isotherm curves and pore size distribution of ZIS, NiCo-PBA and NiCo-PZ-40, respectively.

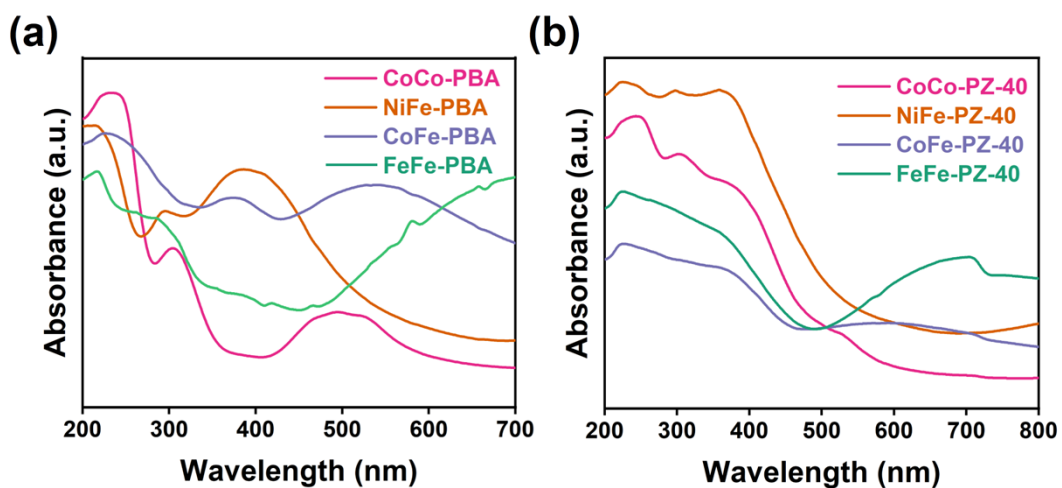

**Fig. S8** UV/Vis spectra of (a) PBAs and (b) PBA@ZIS composites with different metals centers.

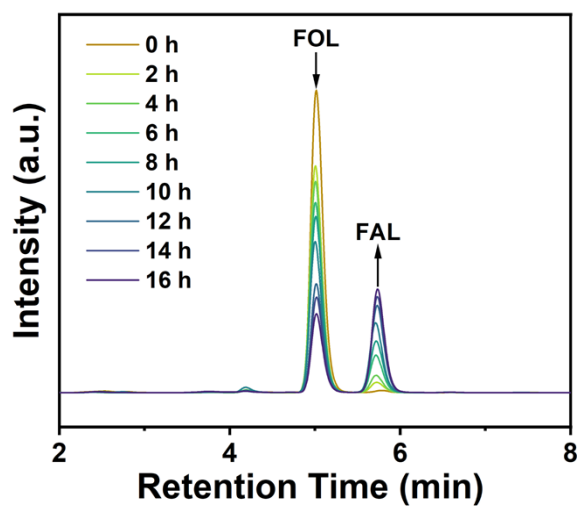

**Fig. S9** Time-dependent HPLC chromatograms of the photocatalytic conversion of FOL by NiCo-PZ-40.

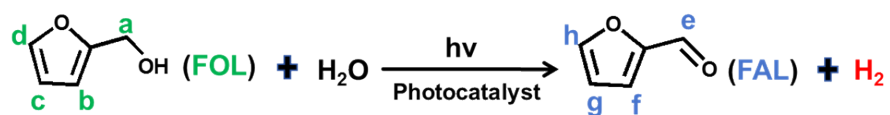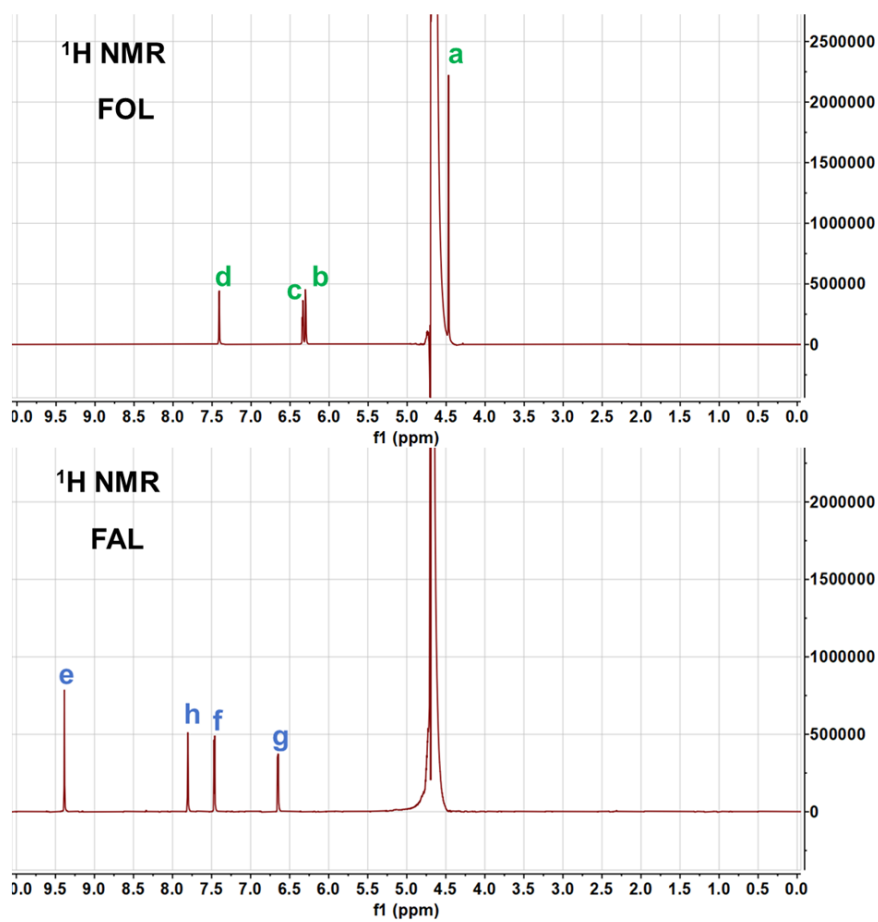

Fig. S10 <sup>1</sup>H NMR spectra of standard FOL and FAL.



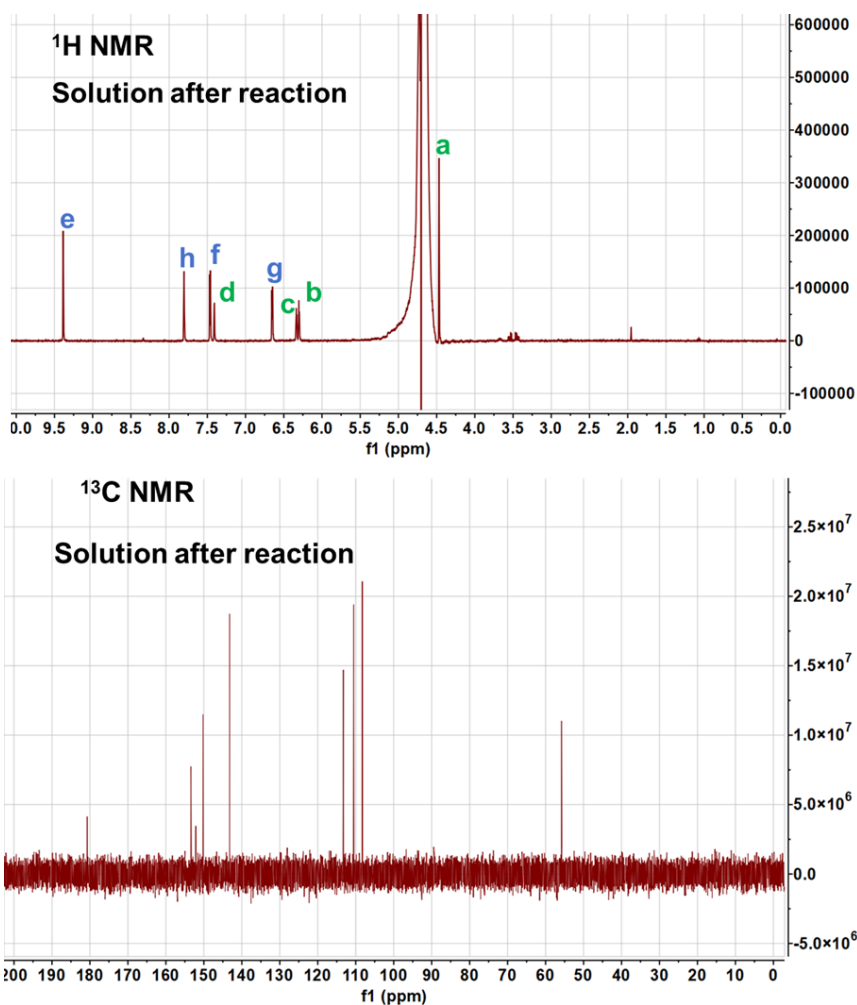

**Fig. S11**  $^1\text{H}$  and  $^{13}\text{C}$  NMR spectra of the solution after photocatalytic reaction.

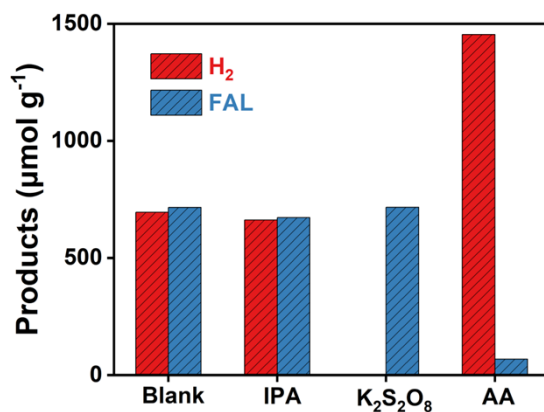

**Fig. S12** Control experiments with different additives (20 mM) catalyzed by NiCo-PZ-40 composites photoirradiation for 3 h. (IPA: hydroxyl radicals trapping reagent,  $\text{K}_2\text{S}_2\text{O}_8$ : electrons trapping reagent and AA: holes trapping reagent).

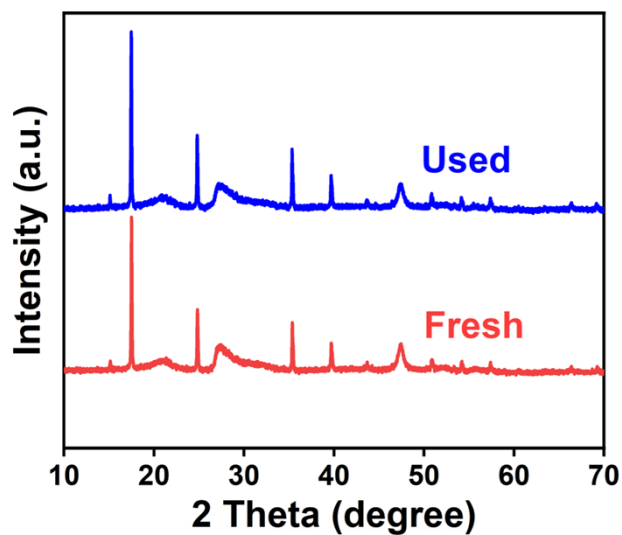

Fig. S13 XRD patterns of NiCo-PZ-40 before and after reaction.

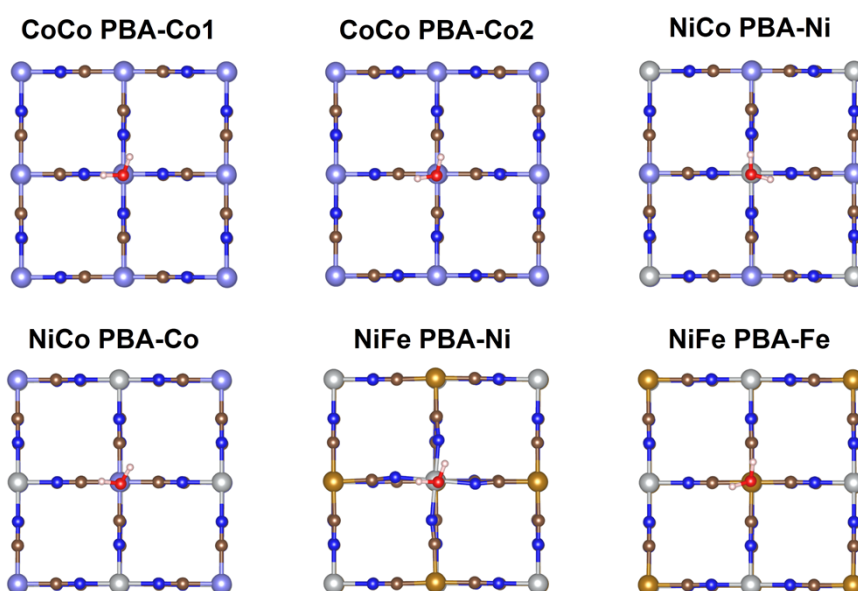

Fig. S14 The DFT calculated models. Light blue, blue, brown, white, red, grey, and bright brown spheres represent Co, N, C, H, O, Ni and Fe atoms, respectively.

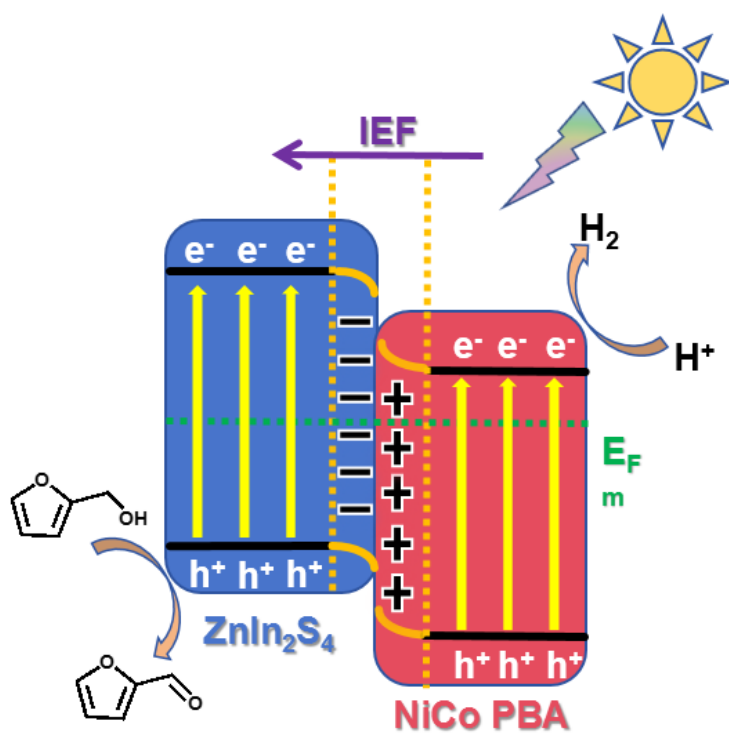

Fig. S15 The photocatalytic coupling mechanism of hydrogen evolution and FAL production.

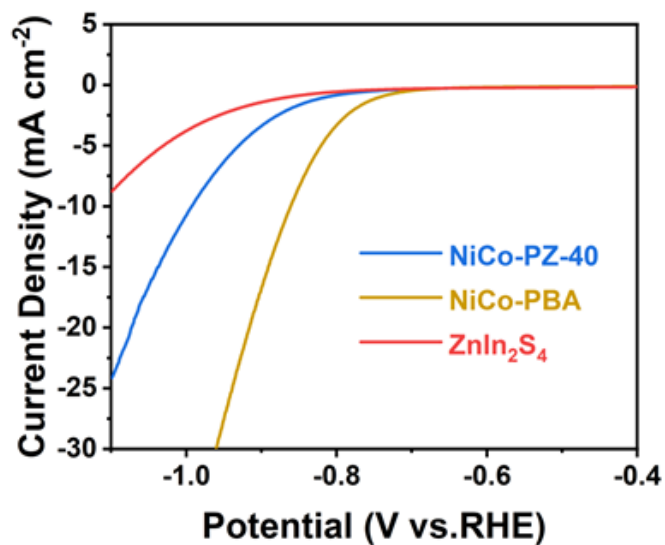

Fig. S16 Linear-sweep voltammograms (LSV) curves of as-prepared samples in 0.5 M K<sub>2</sub>SO<sub>4</sub>.

**Table S1** The metals loading contents in NiCo-PZ-40 estimated by ICP-OES.

| Elements | C <sub>0</sub> (mg/L) | C <sub>x</sub> (mg/kg) | Weight ratio (%) |
|----------|-----------------------|------------------------|------------------|
| Ni       | 2.9382                | 109962.6               | 10.9963%         |
| Co       | 2.1156                | 79175.9                | 7.9176%          |
| Zn       | 1.6714                | 62551.2                | 6.2551%          |
| In       | 5.9991                | 224515.7               | 22.4516%         |

**Table S2** Comparison of recent researches for photocatalytic oxidation of FOL.

| Catalyst                                           | Reaction substrate | H <sub>2</sub> evolution (μmol g <sup>-1</sup> h <sup>-1</sup> ) | Liquid yield (μmol g <sup>-1</sup> h <sup>-1</sup> ) | Ref.      |
|----------------------------------------------------|--------------------|------------------------------------------------------------------|------------------------------------------------------|-----------|
| NiCo-PZ-40                                         | 10 mM FOL          | 739.3                                                            | 705.2                                                | This work |
| Zn <sub>x</sub> In <sub>2</sub> S <sub>3+x</sub>   | 10 mM FOL          | 584                                                              | ~                                                    | S7        |
| Ti <sub>3</sub> C <sub>2</sub> T <sub>x</sub> /CdS | 2.5 mM FOL         | 82                                                               | 92                                                   | S8        |
| 3%Pt/LaVO <sub>4</sub> /CN                         | 10 vol% FOL        | 287                                                              | ~                                                    | S9        |
| 1 wt% Ru/Zn <sub>0.5</sub> Cd <sub>0.5</sub> S     | 17 mM FOL          | 870                                                              | 855                                                  | S10       |
| MCSTC-7.5                                          | 50 mM FOL          | 756.5                                                            | 764.3                                                | S11       |
| ReS <sub>2</sub> /ZnIn <sub>2</sub> S <sub>4</sub> | 10 mM FOL          | 3092.9                                                           | 2981.1                                               | S12       |

## References

- [S1] G. Kresse and J. Furthmüller, Efficiency of Ab-Initio Total Energy Calculations for Metals and Semiconductors Using a Plane-Wave Basis Set, *Comput. Mater. Sci.*, 1996, **6**, 15-50. [https://doi.org/10.1016/0927-0256\(96\)00008-0](https://doi.org/10.1016/0927-0256(96)00008-0)
- [S2] G. Kresse and J. Furthmüller, Efficient Iterative Schemes for Ab Initio Total-Energy Calculations Using a Plane-Wave Basis Set, *Phys. Rev. B*, 1996, **54**, 11169-11186. <https://doi.org/10.1103/PhysRevB.54.11169>
- [S3] J. P. Perdew, K. Burke and M. Ernzerhof, Generalized Gradient Approximation Made Simple, *Phys. Rev. Lett.*, 1996, **77**, 3865-3868. <https://doi.org/10.1103/PhysRevLett.77.3865>
- [S4] G. Kresse and D. Joubert, From Ultrasoft Pseudopotentials to the Projector Augmented-Wave Method, *Phys. Rev. B*, 1999, **59**, 1758-1775. <https://doi.org/10.1016/j.commatsci.2019.109237>
- [S5] P. E. Blöchl, Projector Augmented-Wave Method, *Phys. Rev. B* 1994, **50**, 17953-17979. <https://doi.org/10.1103/PhysRevB.50.17953>
- [S6] S. Grimme, J. Antony, S. Ehrlich and H. Krieg, A consistent and accurate ab initio parametrization of density functional dispersion correction (DFT-D) for the 94 elements H-Pu, *J. Chem. Phys.*, 2010, **132**, 15. <https://doi.org/10.1063/1.3382344>
- [S7] D. Gunawan, J. A. Yuwono, P. V. Kumar, A. Kaleem, M. P Nielsen, M. J. Y. Tayebjee, L. O Antwi, H. Wen, I. Kuschnerus, S. L. Y. Chang, Y. Wang, R. K. Hocking, T. S. Chan, C. Y. Toe, J. Scott and R. Amal, Unraveling the structure-activity-selectivity relationships in furfuryl alcohol photoreforming to H<sub>2</sub> and hydrofuroin over Zn<sub>x</sub>In<sub>2</sub>S<sub>3+x</sub> photocatalysts, *Appl. Catal. B Environ.*, 2023, **335**, 122880. <https://doi.org/10.1016/j.apcatb.2023.122880>.
- [S8] Y. H. Li, F. Zhang, Y. Chen, J. Y. Li and Y. J. Xu, Photoredox-catalyzed biomass intermediate conversion integrated with H<sub>2</sub> production over Ti<sub>3</sub>C<sub>2</sub>T<sub>x</sub>/CdS composites, *Green Chem.*, 2020, **22**, 163-169. <https://doi.org/10.1039/c9gc03332g>.
- [S9] X. Li, J. Hu, T. Yang, X. Yang, J. Qu and C. M. Li, Efficient photocatalytic H<sub>2</sub>-evolution coupled with valuable furfural-production on exquisite 2D/2D LaVO<sub>4</sub>/g-

C<sub>3</sub>N<sub>4</sub> heterostructure, *Nano Energy*, 2022, **92**, 106714.

<https://doi.org/10.1016/j.nanoen.2021.106714>.

[S10] F. Yang, S. Liu, T. Tang, S. Yao and C. An, Visible-light driven H<sub>2</sub> evolution coupled with furfuryl alcohol selective oxidation over Ru atom decorated Zn<sub>0.5</sub>Cd<sub>0.5</sub>S nanorods, *Cataly. Sci. Technol.*, 2023, **13**, 2469-2474.

<https://doi.org/10.1039/D2CY01945K>.

[S11] S. Zhu, Y. Lin and X. Hong, Cooperative biomass-derived furfural synthesis and H<sub>2</sub> evolution in one photoredox cycle over a Mn<sub>x</sub>Cd<sub>1-x</sub>S/Ti<sub>3</sub>C<sub>2</sub> MXene Schottky junction structure, *Appl. Surf. Sci.*, 2024, **649**, 159139.

<https://doi.org/10.1016/j.apsusc.2023.159139>.

[S12] Y. S. Cheng, Z. Y. Xing, Zheng X, X. D. Xu, Y. S. Kang, D. Yu, K. L. Wu, F. H. Wu, G. Yuan and X. W. Wei, Integration of ReS<sub>2</sub> on ZnIn<sub>2</sub>S<sub>4</sub> for boosting the hydrogen evolution coupled with selective oxidation of biomass intermediate under visible light, *Int. J. Hydrogen Energy*, 2023, **48**, 5107-5115.

<https://doi.org/10.1016/j.ijhydene.2022.11.047>.
